# Supplementary material for: Building thermally and chemically reversible covalent bonds in vegetable oil based epoxy thermosets. Influence of epoxy–hardener ratio in promoting recyclability
Source: Royal Society of Chemistry journal article supplement (doi:10.1039/d0ma00370k), 2020-01-01
Supplement: d0ma00370k1.pdf [file d0ma00370k1.pdf]

## Supporting Information

### Building thermally and chemically reversible covalent bonds in vegetable oils based epoxy thermosets. Influence of epoxy-hardener ratio to promote recyclability

Chiara Di MAURO,<sup>a</sup> Aratz GENUA<sup>b</sup> and Alice MIJA<sup>a\*</sup>

<sup>a</sup>Université Côte d'Azur, Institut de Chimie de Nice, UMR CNRS 7272, 28 Avenue Valrose, 06108 Nice Cedex 2, France.

E-mail : Alice.MIJA@univ-cotedazur.fr

<sup>b</sup>CIDETEC, Basque Research and Technology Alliance (BRTA), Paseo Miramón 196, Donostia-San Sebastián 20014, Spain

### Index of Figure and Table

|                                                                                                                                                                                          |    |
|------------------------------------------------------------------------------------------------------------------------------------------------------------------------------------------|----|
| Table S1. Structures and characteristics of the selected reagents. ....                                                                                                                  | 2  |
| Table S2. Formulations composition of the curing systems .....                                                                                                                           | 2  |
| Table S3. Aspect and reprocessing duration at 160 °C and 60 bars for ESO/DTBA and ESO/ELO/DTBA resins.....                                                                               | 4  |
| Table S4. Thermomechanical properties of the virgin and reprocessed ESO/DTBA thermosets .....                                                                                            | 5  |
| Table S5. Thermomechanical properties of the virgin and reprocessed ESO/ELO/DTBA thermosets.....                                                                                         | 5  |
| Table S6. TGA results for the resins and recycled materials during heating at 10 °C/min under air.....                                                                                   | 5  |
| Table S7. Solvent solubility in acetone and THF after 48 hours.....                                                                                                                      | 7  |
| Table S8. TGA results for the ELO/DTBA recycled thermosets: mechanical (M) and chemical and mechanical recycling (C-M).....                                                              | 9  |
|                                                                                                                                                                                          |    |
| Figure S1. DSC thermograms during heating at 10 °C/min of the mixture ELO+ESO in comparison with the reference ELO and ESO, ratios 0.83 and 1.....                                       | 2  |
| Figure S2. FTIR spectra at -OH stretching regions (3700–3300 cm <sup>-1</sup> ) for ELO/DTBA systems in function of the ratio at the beginning (A) and at the end of the curing (B)..... | 3  |
| Figure S3. FTIR spectra of ESO/DTBA systems at different ratios in ester-acid regions: the starting mixture (A) and the cured resins (B).....                                            | 3  |
| Figure S4. Storage modulus E' vs. temperature for the virgin and mechanically reprocessed (M) thermosets.....                                                                            | 4  |
| Figure S5. TGA, DTG and zoom in the region from 25 to 300 °C for the systems ESO/DTBA (heating at 10 °C/min, under air). ....                                                            | 6  |
| Figure S6. TGA, DTG and zoom in the region from 25 to 300 °C for the systems ESO/ELO/DTBA (heating at 10 °C/min, under air). ....                                                        | 6  |
| Figure S7. Swelling ratio Q for the virgin and recycled ESO/DTBA (A) and ESO/ELO/DTBA (B) thermoset resins.....                                                                          | 7  |
| Figure S8. Solvent stability test after 48 hours at room temperature for ELO/DTBA R =0.83 (A), ESO/DTBA R =0.83 (B) and ESO/ELO/DTBA R =0.83. ....                                       | 8  |
| Figure S9. FT-IR of the crosslinked resin ELO/DTBA-IM R 0.83 before and after 48 hours in THF. ....                                                                                      | 9  |
| Figure S10. Storage modulus E' vs. temperature curves for virgin resin ELO/DTBA compared with the resin recycled mechanically (M) and chemically-mechanically (C-M). ....                | 10 |

Table S1. Structures and characteristics of the selected reagents.

| Acronym | Molecular weight [g/mol] | Melting Point [°C] | Epoxy Content (meq.g <sup>-1</sup> ) |
|---------|--------------------------|--------------------|--------------------------------------|
| ELO     | 980                      | -                  | 5,6                                  |
| ESO     | 950                      | -                  | 4,66                                 |
| DTBA    | 306,35                   | 287-290            | /                                    |
| IM      | 68,077                   | 89 - 91            | /                                    |

Table S2. Formulations composition of the curing systems

| Formulations         | Ratio (e/a) | Epoxide (mol)       | DTBA (mol)          |
|----------------------|-------------|---------------------|---------------------|
| ELO/DTBA-0.83        | 1:1.2       | $2.5 \cdot 10^{-4}$ | $8.4 \cdot 10^{-4}$ |
| ELO/DTBA-1           | 1:1         | $2.5 \cdot 10^{-4}$ | $7 \cdot 10^{-4}$   |
| ELO/DTBA- 1.25       | 1:0.8       | $2.5 \cdot 10^{-4}$ | $5.6 \cdot 10^{-4}$ |
| ELO/DTBA- 2          | 1:0.5       | $2.5 \cdot 10^{-4}$ | $3.5 \cdot 10^{-4}$ |
| ELO/DTBA-IM -3.33    | 1:0.3       | $2.5 \cdot 10^{-4}$ | $2.1 \cdot 10^{-4}$ |
| ESO/ DTBA-IM -0.83   | 1:1.2       | $2.6 \cdot 10^{-4}$ | $6.9 \cdot 10^{-4}$ |
| ESO/DTBA-IM -1       | 1:1         | $2.6 \cdot 10^{-4}$ | $5.8 \cdot 10^{-4}$ |
| ESO/DTBA-IM-1.25     | 1:0.8       | $2.6 \cdot 10^{-4}$ | $4.6 \cdot 10^{-4}$ |
| ESO/DTBA-IM-2        | 1:0.5       | $2.6 \cdot 10^{-4}$ | $2.9 \cdot 10^{-4}$ |
| ESO/DTBA- IM-3.33    | 1:0.3       | $2.6 \cdot 10^{-4}$ | $1.7 \cdot 10^{-4}$ |
| ESO/ELO/DTBA-IM-0.83 | 1:1.2       | $7.7 \cdot 10^{-4}$ | $2.4 \cdot 10^{-3}$ |
| ESO/ELO/DTBA-IM-1    | 1:1         | $7.7 \cdot 10^{-4}$ | $2 \cdot 10^{-4}$   |

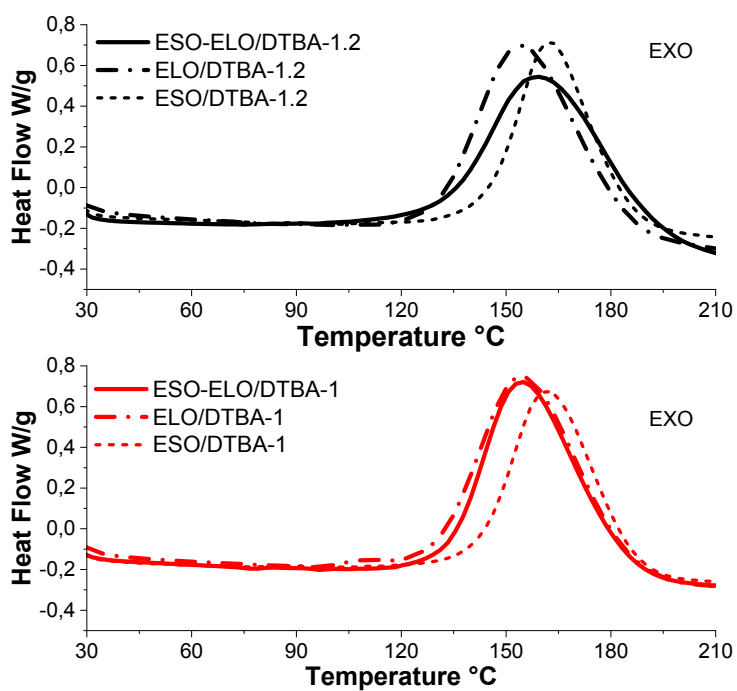

Figure S1. DSC thermograms during heating at 10 °C/min of the mixture ELO+ESO in comparison with the reference ELO and ESO, ratios 0.83 and 1

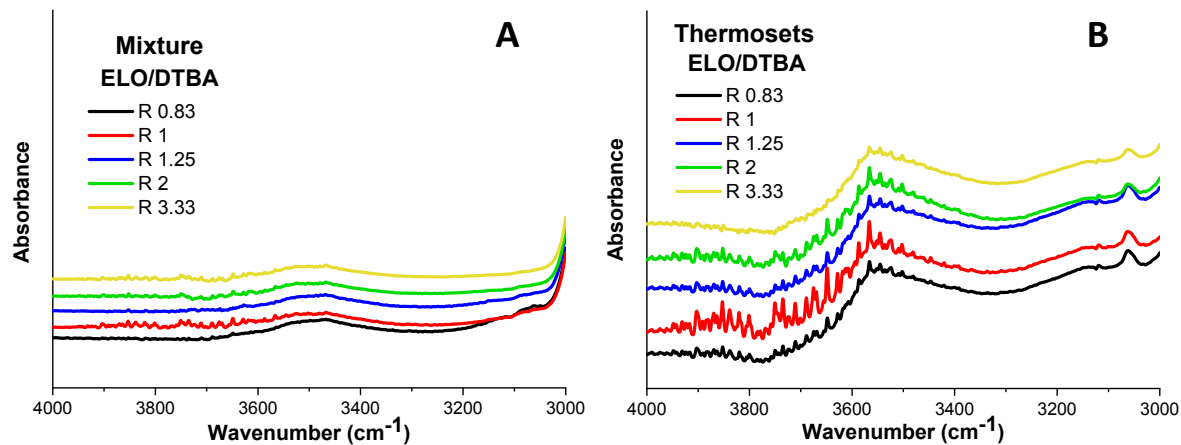

Figure S2. FTIR spectra at -OH stretching regions (3700–3300 cm<sup>-1</sup>) for ELO/DTBA systems in function of the ratio at the beginning (A) and at the end of the curing (B).

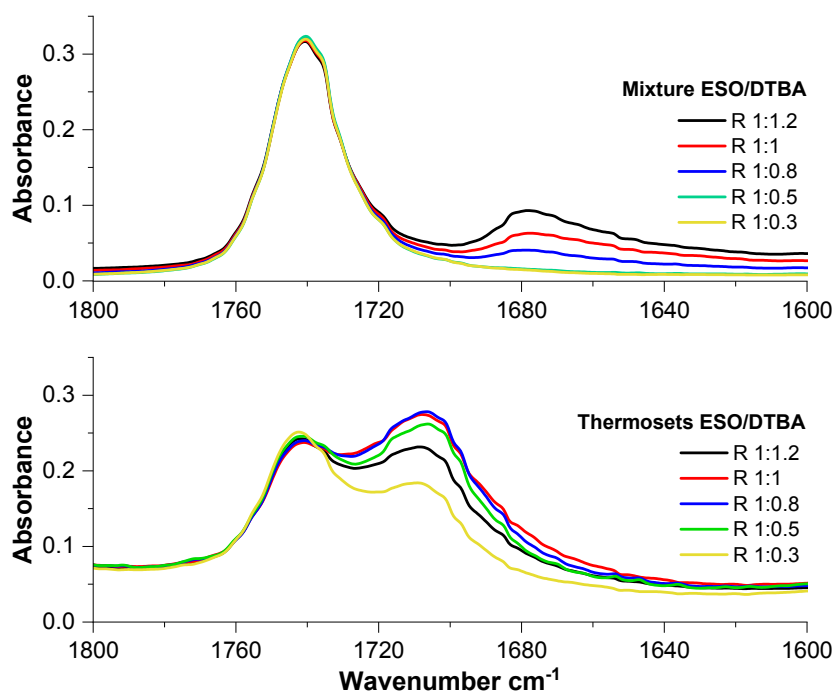

Figure S3. FTIR spectra of ESO/DTBA systems at different ratios in ester-acid regions: the starting mixture (A) and the cured resins (B)

Table S3. Aspect and reprocessing duration at 160 °C and 60 bars for ESO/DTBA and ESO/ELO/DTBA resins.

|                                      |                                                                                   |                                                                                    |                                                                                     |
|--------------------------------------|-----------------------------------------------------------------------------------|------------------------------------------------------------------------------------|-------------------------------------------------------------------------------------|
| Ratio                                | 0.83                                                                              | 1                                                                                  | 1.25                                                                                |
| ESO/DTBA<br><br>M-Reprocessed resins |  |  |  |
| Time / min                           | 15                                                                                | 10                                                                                 | 5                                                                                   |

  

|                                          |                                                                                   |                                                                                   |
|------------------------------------------|-----------------------------------------------------------------------------------|-----------------------------------------------------------------------------------|
| Ratio                                    | 0.83                                                                              | 1                                                                                 |
| ESO/ELO/DTBA<br><br>M-Reprocessed resins |  |  |
| Time / min                               | 15                                                                                | 10                                                                                |

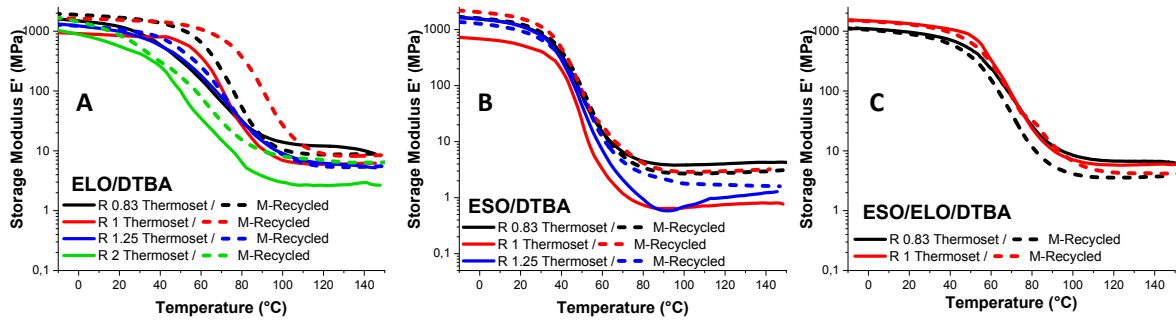

Figure S4. Storage modulus  $E'$  vs. temperature for the virgin and mechanically reprocessed (M) thermosets

Table S4. Thermomechanical properties of the virgin and reprocessed ESO/DTBA thermosets

| Parameters                                   | ESO/DTBA          |      |      |       |      |      |      |
|----------------------------------------------|-------------------|------|------|-------|------|------|------|
|                                              | Virgin/M-Recycled | V*   | M-R* | V*    | M-R* | V*   | M-R* |
| Ratio                                        |                   | 0.83 |      | 1     |      | 1.25 |      |
| $\tan \delta$                                |                   | 53   | 60   | 52    | 60   | 58   | 58   |
| $\tan \delta_{\max}$                         |                   | 0.94 | 1.07 | 0.96  | 1.14 | 0.95 | 0.98 |
| $E'_{\text{glassy state}}$ (MPa)             |                   | 1900 | 1800 | 900   | 2330 | 2000 | 1450 |
| $E'_{\text{rubbery state}}$ (MPa)            |                   | 3.18 | 3.41 | 0.69  | 3.20 | 1.14 | 0.47 |
| Crosslinking density (mmol/cm <sup>3</sup> ) |                   | 0.41 | 0.28 | 0.082 | 0.31 | 0.12 | 0.18 |

Table S5. Thermomechanical properties of the virgin and reprocessed ESO/ELO/DTBA thermosets.

| Parameters                                   | ESO/ELO/DTBA      |      |      |      |      |
|----------------------------------------------|-------------------|------|------|------|------|
|                                              | Virgin/M-Recycled | V*   | M-R* | V*   | M-R* |
| Ratio                                        |                   | 0.83 |      | 1    |      |
| $\tan \delta$                                |                   | 78   | 74   | 79   | 83   |
| $\tan \delta_{\max}$                         |                   | 0.56 | 0.82 | 0.66 | 0.82 |
| $E'_{\text{glassy state}}$ (MPa)             |                   | 1000 | 1170 | 1750 | 1580 |
| $E'_{\text{rubbery state}}$ (MPa)            |                   | 3.04 | 4.09 | 4.45 | 4.21 |
| Crosslinking density (mmol/cm <sup>3</sup> ) |                   | 0.45 | 0.36 | 0.58 | 0.42 |

Table S6. TGA results for the resins and recycled materials during heating at 10 °C/min under air.

| EVOs/DTBA | Ratio |      | $T_{5\%}$ (°C) | 1 <sup>st</sup> Residue (%) | 1 <sup>st</sup> Degradation peak (°C) | 2 <sup>nd</sup> Residue (%) | 2 <sup>nd</sup> Degradation peak (°C) |
|-----------|-------|------|----------------|-----------------------------|---------------------------------------|-----------------------------|---------------------------------------|
| ELO       | 0.83  | V*   | 271            | 23.6                        | 310                                   | 0.25                        | 517                                   |
|           |       | M-R* | 271            | 23.1                        | 310                                   | 0.23                        | 517                                   |
|           | 1     | V*   | 275            | 19.4                        | 307                                   | 0.67                        | 517                                   |
|           |       | M-R* | 275            | 23.4                        | 310                                   | 0.20                        | 526                                   |
|           | 1.25  | V*   | 281            | 21.3                        | 310                                   | 0.73                        | 517                                   |
|           |       | M-R* | 281            | 22.0                        | 310                                   | 0.35                        | 526                                   |
| ESO       | 0.83  | V*   | 271            | 19.9                        | 310                                   | 0.29                        | 526                                   |
|           |       | M-R* | 271            | 18.4                        | 310                                   | 0.99                        | 517                                   |
|           | 1     | V*   | 271            | 18.4                        | 310                                   | 0.42                        | 526                                   |
|           |       | M-R* | 271            | 19.9                        | 310                                   | 0.53                        | 517                                   |
|           | 1.25  | V*   | 281            | 24.1                        | 310                                   | 0.22                        | 507                                   |
|           |       | M-R* | 281            | 24.1                        | 310                                   | 0.46                        | 517                                   |
| ESO/ELO   | 0.83  |      | 271            | 18.8                        | 310                                   | 0.35                        | 517                                   |
|           |       | M-R* | 271            | 25.0                        | 310                                   | 0.15                        | 517                                   |
|           | 1     | V*   | 271            | 25.5                        | 300                                   | 0.14                        | 517                                   |
|           |       | M-R* | 271            | 28.4                        | 300                                   | 0.53                        | 517                                   |

V\* virgin, M-R\* mechanical recycled

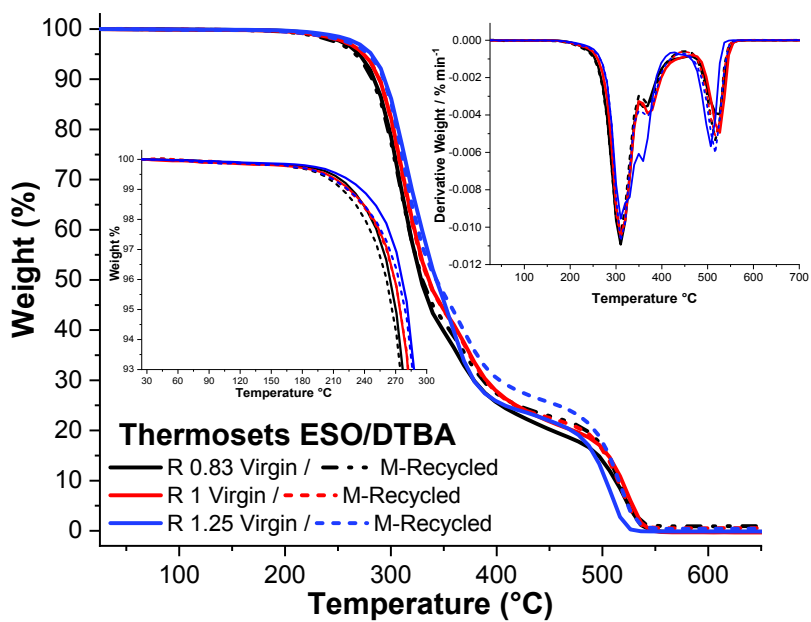

Figure S5. TGA, DTG and zoom in the region from 25 to 300 °C for the systems ESO/DTBA (heating at 10 °C/min, under air).

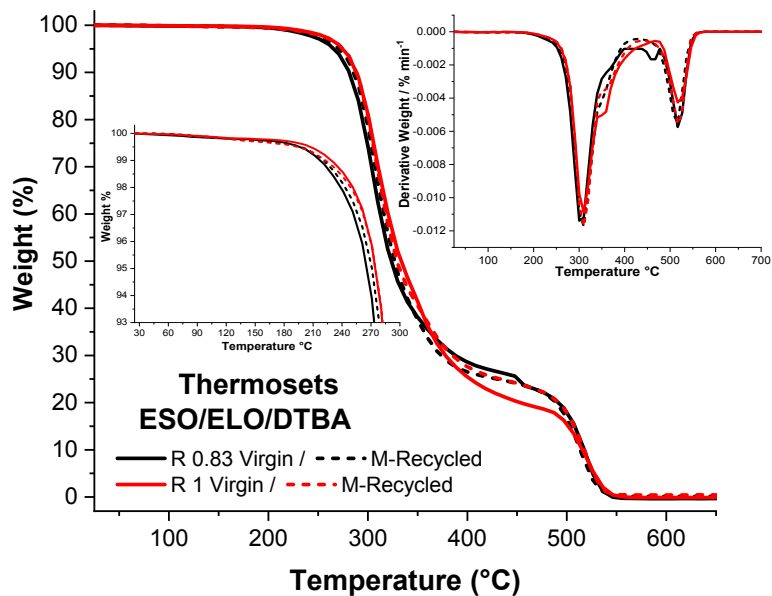

Figure S6. TGA, DTG and zoom in the region from 25 to 300 °C for the systems ESO/ELO/DTBA (heating at 10 °C/min, under air).

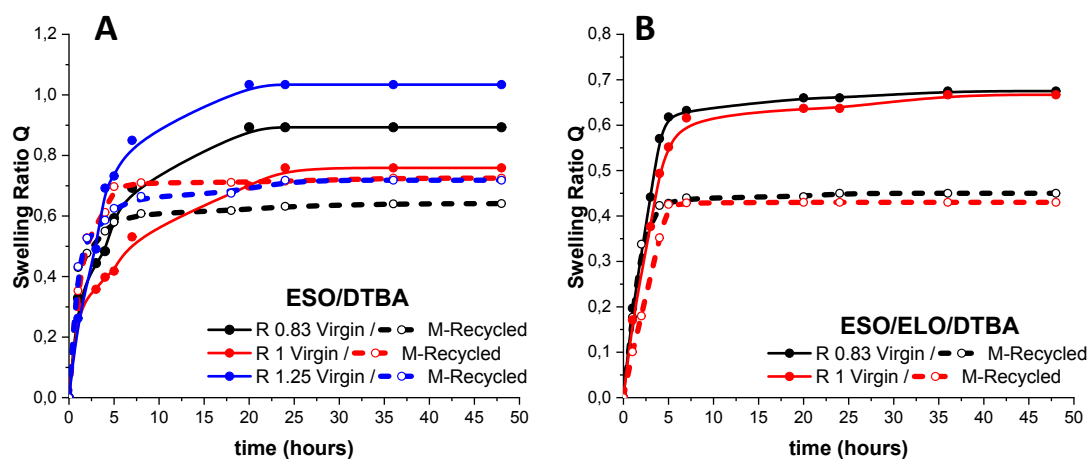

Figure S7. Swelling ratio Q for the virgin and recycled ESO/DTBA (A) and ESO/ELO/DTBA (B) thermoset resins.

Table S7. Solvent solubility in acetone and THF after 48 hours.

| EVOs/DTBA    | Ratio | Solubility % in acetone | Solubility % in THF |
|--------------|-------|-------------------------|---------------------|
| ELO/DTBA     | 0.83  | 0.70                    | 0.095               |
|              | 1     | 0.30                    | 0.068               |
|              | 1.25  | 0.15                    | 0.057               |
| ESO/DTBA     | 2     | 0.11                    | 0.036               |
|              | 0.83  | 0.87                    | 0.12                |
|              | 1     | 0.74                    | 0.81                |
| ESO/ELO/DTBA | 1.25  | 0.55                    | 0.055               |
|              | 0.83  | 0.75                    | 0.088               |
|              | 1     | 0.51                    | 0.064               |

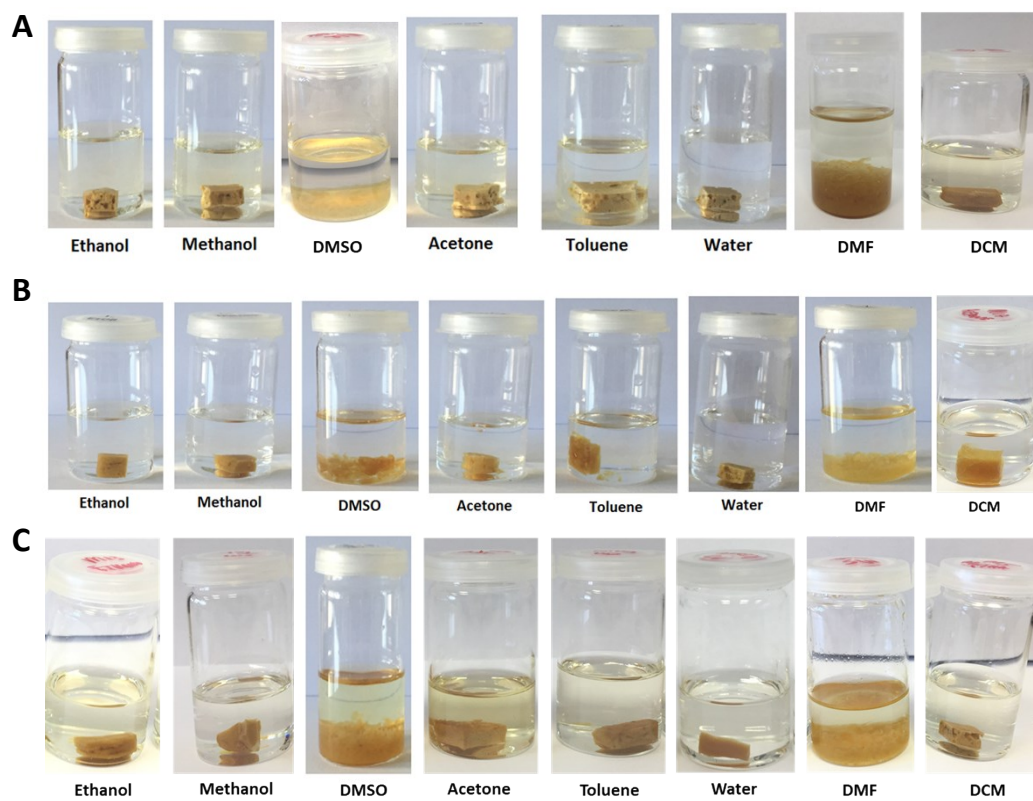

Figure S8. Solvent stability test after 48 hours at room temperature for ELO/DTBA R =0.83 (A), ESO/DTBA R =0.83 (B) and ESO/ELO/DTBA R =0.83.

---



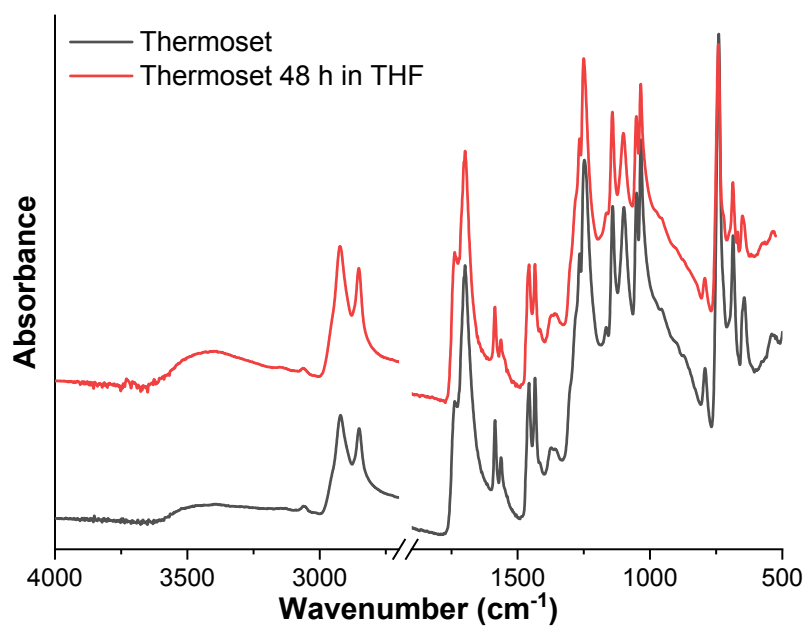

Figure S9. FT-IR of the crosslinked resin ELO/DTBA-IM R 0.83 before and after 48 hours in THF.

Table S8. TGA results for the ELO/DTBA recycled thermosets: mechanical (M) and chemical and mechanical recycling (C-M).

| EVOs/DTBA | Ratio |              | T <sub>5%</sub><br>(°C) | 1 <sup>st</sup> Residue<br>(%) | 1 <sup>st</sup> Degradation<br>peak (°C) | 2 <sup>nd</sup> Residue<br>(%) | 2 <sup>nd</sup> Degradation<br>peak (°C) |
|-----------|-------|--------------|-------------------------|--------------------------------|------------------------------------------|--------------------------------|------------------------------------------|
| ELO       | 0.83  | M-Recycled   | 271                     | 23.1                           | 310                                      | 0.23                           | 517                                      |
|           |       | Recycled C-M | 250                     | 23.8                           | 307                                      | 0.16                           | 517                                      |
|           | 1     | M-Recycled   | 275                     | 23.4                           | 310                                      | 0.20                           | 526                                      |
|           |       | Recycled C-M | 265                     | 28.3                           | 308                                      | 0.13                           | 513                                      |
|           | 1.25  | M-Recycled   | 281                     | 22.0                           | 310                                      | 0.35                           | 526                                      |
|           |       | Recycled C-M | 280                     | 28.9                           | 307                                      | 0.13                           | 518                                      |
|           | 2     | M-Recycled   | 291                     | 27.9                           | 310                                      | 0.20                           | 526                                      |
|           |       | Recycled C-M | 290                     | 20.9                           | 310                                      | 0.09                           | 520                                      |

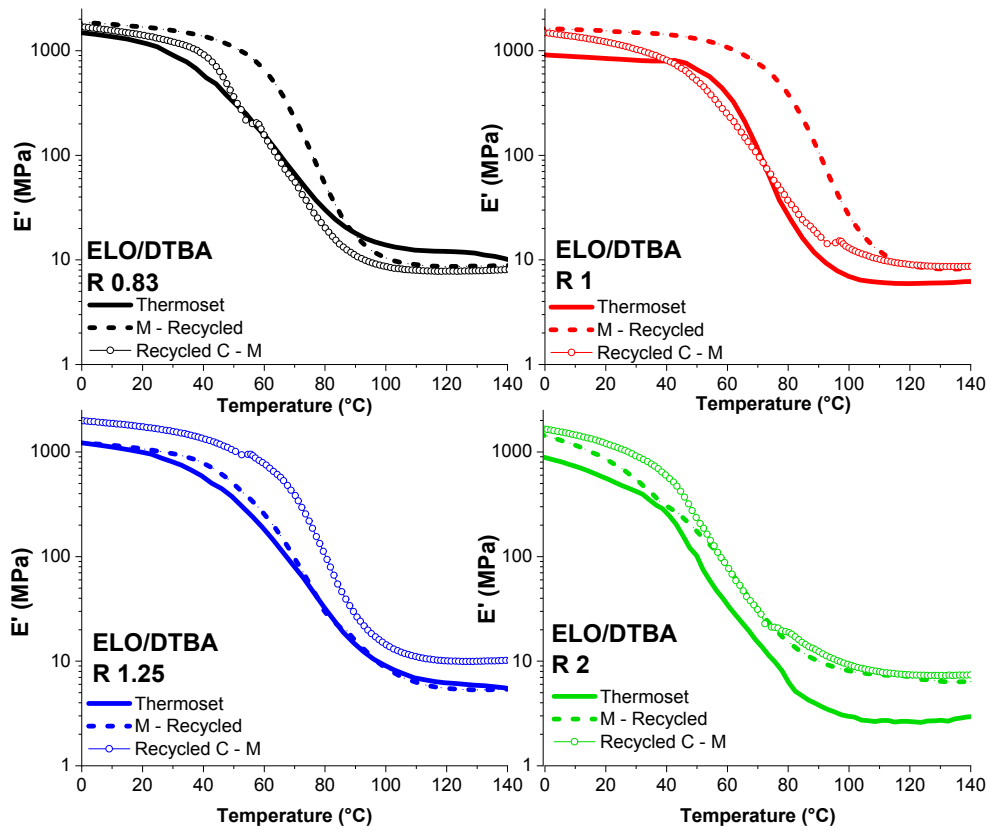

Figure S10. Storage modulus  $E'$  vs. temperature curves for virgin resin ELO/DTBA compared with the resin recycled mechanically (M) and chemically-mechanically (C-M).
